# Supplementary material for: Host Genetic Variation Influences Gene Expression Response to Rhinovirus Infection
Source: PubMed Central journal article supplement (PMC4395341; doi:10.1371/journal.pgen.1005111), 2015-04-13
Supplement: pgen.1005111.s001.pdf [file pgen.1005111.s001.pdf]

A

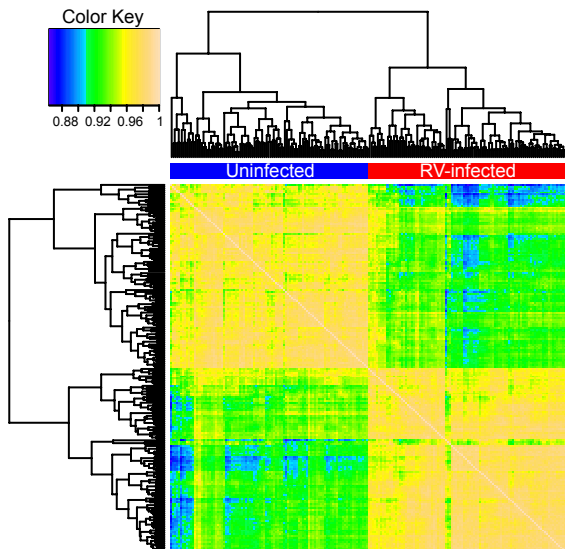

B

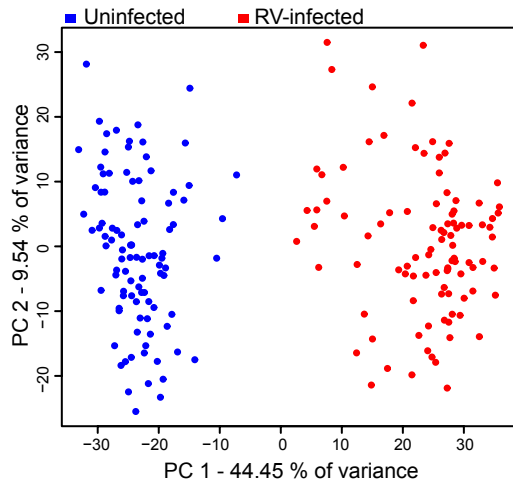

C

| PC (Variance Explained) | Treatment | Gender | Virus Batch | Processing Day | Chip Number | PBMC count | Age    | Ancestry Fraction 1 | Ancestry Fraction 2 | Ancestry Fraction 3 |
|-------------------------|-----------|--------|-------------|----------------|-------------|------------|--------|---------------------|---------------------|---------------------|
| PC1 (44.45%)            | <2.20E-16 | 0.3722 | 0.1438      | 0.6708         | 0.6359      | 0.2886     | 0.8437 | 0.8738              | 0.6851              | 0.6958              |
| PC2 (9.54%)             | 0.4736    | 0.5948 | 0.02653     | <2.20E-16      | 0.1665      | 0.0954     | 0.0028 | 0.1344              | 0.0023              | 0.00369             |
| PC3 (7.22%)             | 0.02592   | 0.0007 | <2.20E-16   | <2.20E-16      | 0.0807      | 9.70E-08   | 0.0007 | 0.6815              | 0.5302              | 0.5565              |
| PC4 (6.27%)             | 0.5003    | 0.988  | 7.47E-08    | 1.22E-15       | 0.652       | 0.2093     | 0.0262 | 0.06226             | 0.8927              | 0.7412              |
