# Supplementary material for: Host Genetic Variation Influences Gene Expression Response to Rhinovirus Infection
Source: PubMed Central journal article supplement (PMC4395341; doi:10.1371/journal.pgen.1005111), 2015-04-13
Supplement: pgen.1005111.s002.pdf [file pgen.1005111.s002.pdf]

A

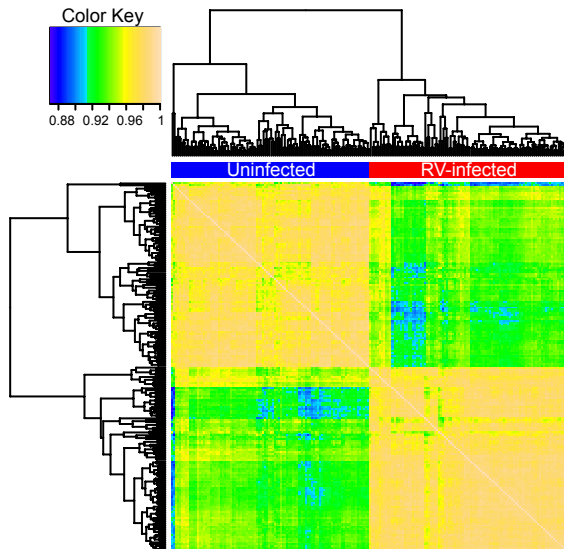

B

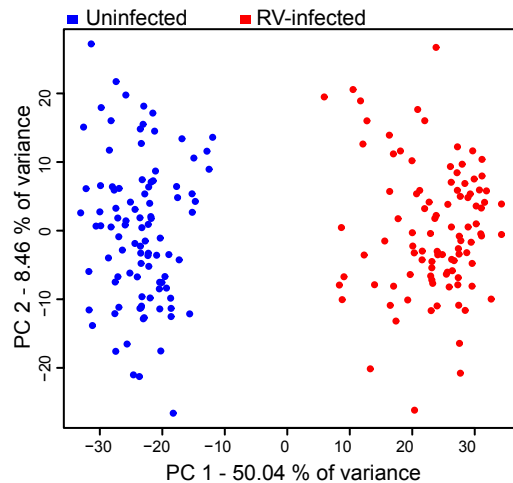

C

| PC (Variance Explained) | Treatment | Gender | Virus Batch | Processing Day | Chip Number | PBMC count | Age    | Ancestry Fraction 1 | Ancestry Fraction 2 | Ancestry Fraction 3 |
|-------------------------|-----------|--------|-------------|----------------|-------------|------------|--------|---------------------|---------------------|---------------------|
| PC1 (50.04%)            | <2.20E-16 | 0.4567 | 1           | 1              | 0.75        | 0.7836     | 0.7543 | 0.8245              | 0.7403              | 0.7215              |
| PC2 (8.46%)             | 0.8569    | 0.302  | 1           | 1              | 0.4193      | 0.0519     | 0.0557 | 0.1185              | 0.1204              | 0.1624              |
| PC3 (5.32%)             | 0.1946    | 0.0066 | 1           | 1              | 0.6354      | 0.1463     | 0.1272 | 0.9472              | 0.04747             | 0.04704             |
