# Supplementary material for: Host Genetic Variation Influences Gene Expression Response to Rhinovirus Infection
Source: PubMed Central journal article supplement (PMC4395341; doi:10.1371/journal.pgen.1005111), 2015-04-13

# Genes with reQTLs

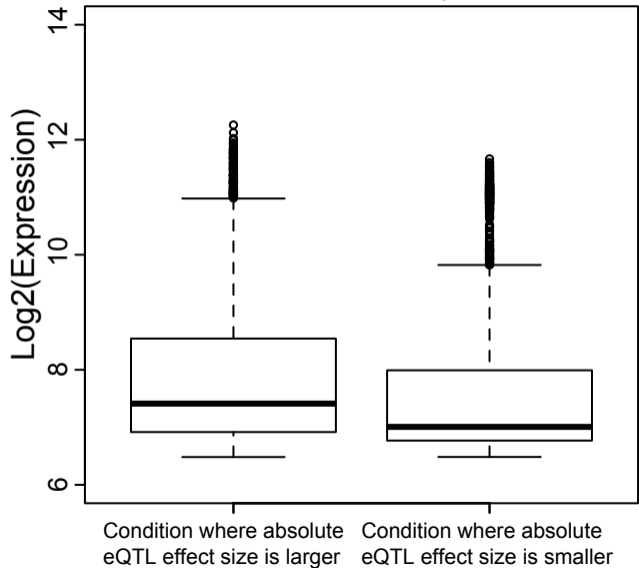

Supplement: pgen.1005111.s004.pdf [file pgen.1005111.s004.pdf]
