# Supplementary material for: Host Genetic Variation Influences Gene Expression Response to Rhinovirus Infection
Source: PubMed Central journal article supplement (PMC4395341; doi:10.1371/journal.pgen.1005111), 2015-04-13

**A**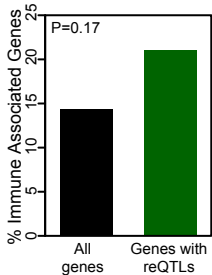**B**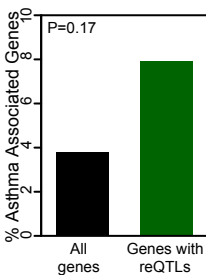**C**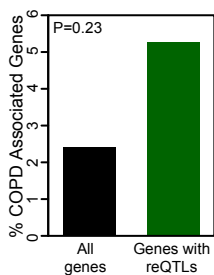**D**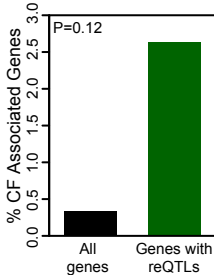

Supplement: pgen.1005111.s005.pdf [file pgen.1005111.s005.pdf]
