# Supplementary material for: Host Genetic Variation Influences Gene Expression Response to Rhinovirus Infection
Source: PubMed Central journal article supplement (PMC4395341; doi:10.1371/journal.pgen.1005111), 2015-04-13

**EXOSC9 in Uninfected Cells**

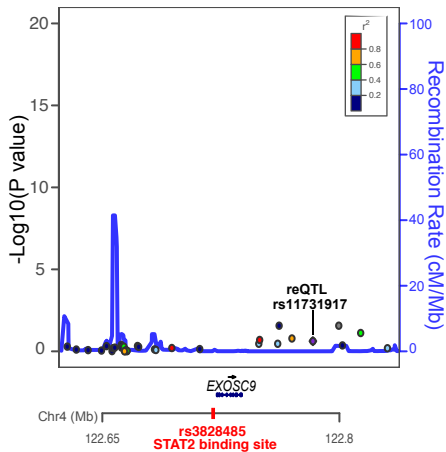

**EXOSC9 in RV-infected Cells**

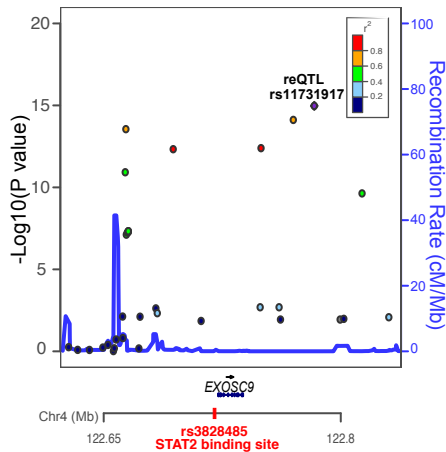

**PRR24 in Uninfected Cells**

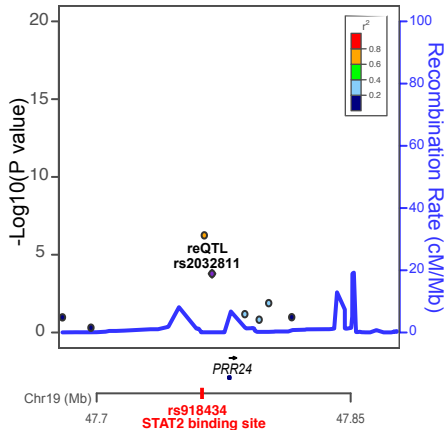

**PRR24 in RV-infected Cells**

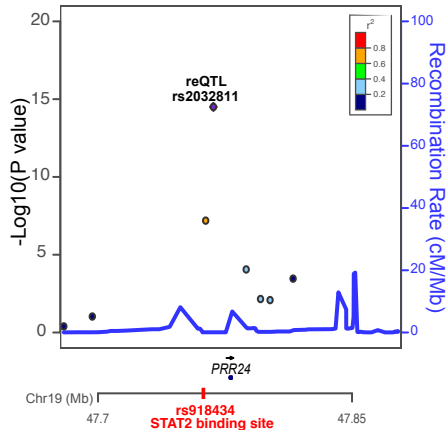

**OAS1 in Uninfected Cells**

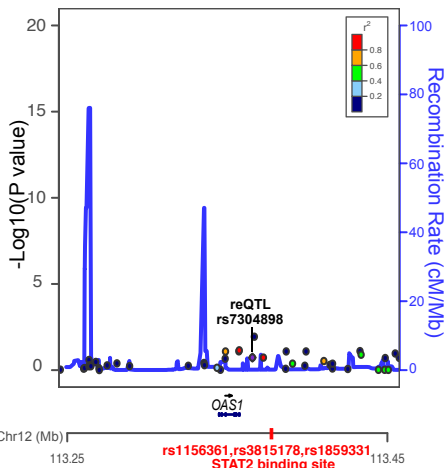

**OAS1 in RV-infected Cells**

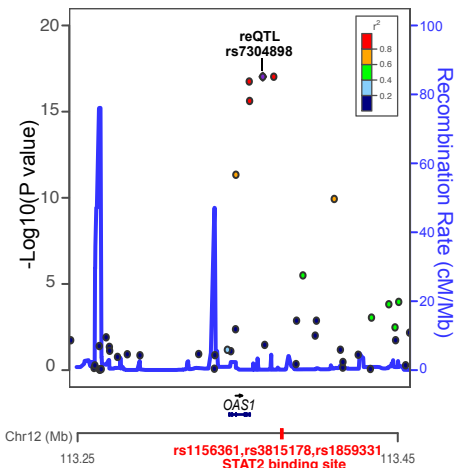

**ARL5B in Uninfected Cells**

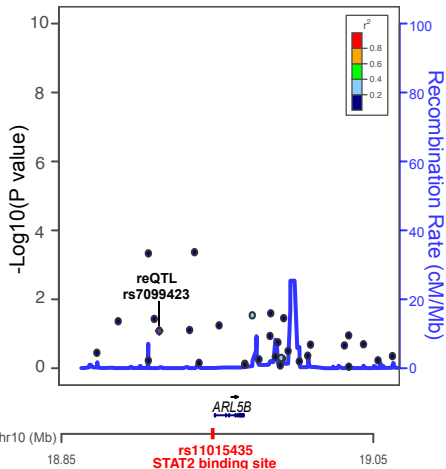

**ARL5B in RV-infected Cells**

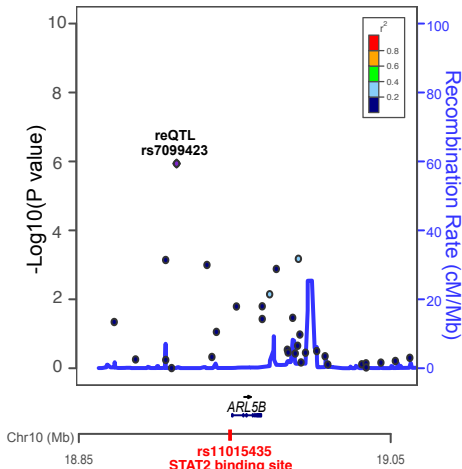

Supplement: pgen.1005111.s006.pdf [file pgen.1005111.s006.pdf]
