# Supplementary material for: Host Genetic Variation Influences Gene Expression Response to Rhinovirus Infection
Source: PubMed Central journal article supplement (PMC4395341; doi:10.1371/journal.pgen.1005111), 2015-04-13
Supplement: pgen.1005111.s008.pdf [file pgen.1005111.s008.pdf]

**Table S1.** Overlap between RV-responsive genes in bronchial epithelial cells (BECs) and in PBMCs. Among the genes that were targeted in both studies, 86.5% (32 out of 37) with  $\geq 2$ -fold increase in response to RV infection in BECs also showed  $\geq 2$ -fold increase in response to RV infection in PBMCs.

| Gene Name      | Fold Increase in BECs | Fold Increase in PBMCs                  |
|----------------|-----------------------|-----------------------------------------|
| CXCL10         | 11.5                  | 25.39                                   |
| C1orf29/IFI44L | 16.17                 | 25.02                                   |
| ISG15          | 13.86                 | 21.18                                   |
| IFIT4/IFIT3    | 4.36                  | 21.00                                   |
| Viperin/RSAD2  | 11.51                 | 20.92                                   |
| IFIT2          | 4.11                  | 18.42                                   |
| IFITM3         | 2.05                  | 16.48                                   |
| OAS1           | 4.88                  | 12.27                                   |
| IFI44          | 3.84                  | 11.71                                   |
| IFIT1          | 21.47                 | 11.40                                   |
| MX2            | 9.01                  | 11.04                                   |
| MX1            | 9.94                  | 10.51                                   |
| LOC51191/HERC5 | 3.05                  | 10.25                                   |
| OASL           | 2.61                  | 9.86                                    |
| IRF7           | 5.5                   | 8.27                                    |
| G1P3/IFI6      | 8.13                  | 7.82                                    |
| HSXIAPAF1/XAF1 | 2.79                  | 7.28                                    |
| IFI35          | 4.09                  | 6.92                                    |
| GBP1           | 4.16                  | 6.48                                    |
| OAS2           | 6.05                  | 5.59                                    |
| LAMP3          | 6.06                  | 5.32                                    |
| ISG20          | 2.82                  | 5.11                                    |
| IFITM2         | 2.1                   | 4.99                                    |
| RIG-I/DDX58    | 3.79                  | 4.98                                    |
| OAS3           | 6.19                  | 4.13                                    |
| SP110          | 2.29                  | 4.05                                    |
| LAP3           | 2.69                  | 3.63                                    |
| ECGF1/TYMP     | 2.2                   | 3.24                                    |
| BST2           | 5.16                  | 3.17                                    |
| WARS           | 4.13                  | 3.16                                    |
| STAT1          | 4.08                  | 2.94                                    |
| TOR1B          | 2.27                  | 2.57                                    |
| APOBEC3A       | 2.37                  | 1.45                                    |
| TRIM14         | 2.19                  | 1.23                                    |
| HRASLS2        | 2.3                   | 1.11                                    |
| CIC            | 2.53                  | 1.02                                    |
| CXCL11         | 17.64                 | Not expressed                           |
| FLJ20637       | 3.43                  | Not targeted / Excluded during probe QC |
| MDA5           | 3.5                   | Not targeted / Excluded during probe QC |
| FLJ20073       | 2.65                  | Not targeted / Excluded during probe QC |
| FLJ22693       | 2.57                  | Not targeted / Excluded during probe QC |
| FLJ20035       | 2.45                  | Not targeted / Excluded during probe QC |

*Continued on next page*

*Table S1 – Continued from previous page*

|        |       |                                         |
|--------|-------|-----------------------------------------|
| PKR    | 2.3   | Not targeted / Excluded during probe QC |
| ISGF3G | 2.12  | Not targeted / Excluded during probe QC |
| IFRG28 | 2.02  | Not targeted / Excluded during probe QC |
| IFI27  | 12.44 | Not targeted / Excluded during probe QC |
| IFITM1 | 4.63  | Not targeted / Excluded during probe QC |
| USP18  | 2.44  | Not targeted / Excluded during probe QC |
