# Supplementary material for: Host Genetic Variation Influences Gene Expression Response to Rhinovirus Infection
Source: PubMed Central journal article supplement (PMC4395341; doi:10.1371/journal.pgen.1005111), 2015-04-13
Supplement: pgen.1005111.s009.pdf [file pgen.1005111.s009.pdf]

**Table S2.** Overlap between RV-responsive genes in nasal epithelial scrapings (NESs) and in PBMCs. Among the genes that were targeted in both studies, 73.3% (22 out of 30) with  $\geq 2$ -fold increase in response to RV infection in NESs also showed  $\geq 2$ -fold increase in response to RV infection in PBMCs.

| Gene Name    | Fold Increase in NESs | Fold Increase in PBMCs                  |
|--------------|-----------------------|-----------------------------------------|
| CCL8         | 43.8                  | 71.45                                   |
| CXCL10       | 25.5                  | 25.39                                   |
| G1P2/ISG15   | 7.61                  | 21.18                                   |
| IFIT4/IFIT3  | 7.56                  | 21.00                                   |
| CIG5/RSAD2   | 6.72                  | 20.92                                   |
| IFIT2        | 11.4                  | 18.42                                   |
| CCL2         | 55                    | 16.57                                   |
| OAS1         | 3.78                  | 12.27                                   |
| IFIT1        | 8.82                  | 11.40                                   |
| MX2          | 4.26                  | 11.04                                   |
| MX1          | 3.29                  | 10.51                                   |
| OASL         | 4.57                  | 9.86                                    |
| IRF7         | 4.16                  | 8.27                                    |
| CXCL9        | 12.9                  | 8.07                                    |
| EPSTI1       | 4.45                  | 7.66                                    |
| GBP1         | 11.1                  | 6.48                                    |
| OAS2         | 4.35                  | 5.59                                    |
| RIGI/DDX58   | 3.45                  | 4.98                                    |
| PLSCR1       | 2.53                  | 4.17                                    |
| OAS3         | 4.72                  | 4.13                                    |
| SOCS1        | 31.7                  | 3.96                                    |
| HAPLN3       | 6.43                  | 3.47                                    |
| SOCS2        | 6.93                  | 1.79                                    |
| CCL20        | 12                    | 1.50                                    |
| ICAM-1/ICAM1 | 8.48                  | 1.31                                    |
| CXCL13       | 14.8                  | 1.21                                    |
| SOCS3        | 2.91                  | 1.08                                    |
| TNC          | 2.8                   | 0.97                                    |
| CXCL11       | 37.4                  | Not expressed                           |
| MMP12        | 4.7                   | Not expressed                           |
| NOS2A        | 6.07                  | Not targeted / Excluded during probe QC |
| IL28B/IFNL3  | 5.56                  | Not targeted / Excluded during probe QC |
| MDA5         | 3.69                  | Not targeted / Excluded during probe QC |
