# Supplementary material for: Host Genetic Variation Influences Gene Expression Response to Rhinovirus Infection
Source: PubMed Central journal article supplement (PMC4395341; doi:10.1371/journal.pgen.1005111), 2015-04-13
Supplement: pgen.1005111.s010.pdf [file pgen.1005111.s010.pdf]

**Table S3.** Gene ontology (GO) enrichment analysis for the 271 genes that were both statistically differentially expressed and had a fold change of  $\geq 2$  in response to RV infection. Enriched GO categories at P value cut-off of  $10^{-5}$  are shown.

| Enriched GO Categories                                | Observed Number of Genes | Expected Number of Genes | Fold Enrichment | Enrichment P Value     |
|-------------------------------------------------------|--------------------------|--------------------------|-----------------|------------------------|
| response to stimulus                                  | 122                      | 50.83                    | 2.4             | $1.20 \times 10^{-25}$ |
| response to other organism                            | 40                       | 4.94                     | 8.1             | $4.00 \times 10^{-25}$ |
| response to biotic stimulus                           | 43                       | 6.62                     | 6.5             | $5.50 \times 10^{-23}$ |
| immune system process                                 | 67                       | 17.63                    | 3.8             | $9.30 \times 10^{-23}$ |
| immune response                                       | 54                       | 11.74                    | 4.6             | $1.10 \times 10^{-21}$ |
| response to virus                                     | 27                       | 2.23                     | 12.1            | $1.10 \times 10^{-21}$ |
| defense response                                      | 49                       | 10.00                    | 4.9             | $6.70 \times 10^{-21}$ |
| response to external stimulus                         | 54                       | 14.21                    | 3.8             | $9.50 \times 10^{-18}$ |
| multi-organism process                                | 49                       | 12.25                    | 4               | $5.80 \times 10^{-17}$ |
| response to stress                                    | 75                       | 28.85                    | 2.6             | $2.80 \times 10^{-15}$ |
| response to wounding                                  | 36                       | 8.51                     | 4.2             | $3.70 \times 10^{-13}$ |
| inflammatory response                                 | 27                       | 5.40                     | 5               | $1.60 \times 10^{-11}$ |
| response to chemical stimulus                         | 57                       | 21.92                    | 2.6             | $1.60 \times 10^{-11}$ |
| taxis                                                 | 18                       | 2.73                     | 6.6             | $9.80 \times 10^{-10}$ |
| chemotaxis                                            | 18                       | 2.73                     | 6.6             | $9.80 \times 10^{-10}$ |
| response to molecule of bacterial origin              | 13                       | 1.78                     | 7.3             | $1.30 \times 10^{-07}$ |
| response to lipopolysaccharide                        | 12                       | 1.58                     | 7.6             | $2.90 \times 10^{-07}$ |
| locomotory behavior                                   | 18                       | 4.09                     | 4.4             | $5.10 \times 10^{-07}$ |
| locomotion                                            | 22                       | 6.29                     | 3.5             | $8.40 \times 10^{-07}$ |
| regulation of defense response                        | 14                       | 2.59                     | 5.4             | $1.30 \times 10^{-06}$ |
| response to bacterium                                 | 15                       | 3.00                     | 5               | $1.30 \times 10^{-06}$ |
| response to organic substance                         | 32                       | 12.80                    | 2.5             | $2.40 \times 10^{-06}$ |
| innate immune response                                | 13                       | 2.32                     | 5.6             | $2.70 \times 10^{-06}$ |
| cell-cell signaling                                   | 22                       | 6.67                     | 3.3             | $2.90 \times 10^{-06}$ |
| regulation of response to stimulus                    | 25                       | 8.62                     | 2.9             | $3.30 \times 10^{-06}$ |
| regulation of cytokine production                     | 16                       | 3.72                     | 4.3             | $3.70 \times 10^{-06}$ |
| cell communication                                    | 28                       | 10.37                    | 2.7             | $4.20 \times 10^{-06}$ |
| cellular di-, tri-valent inorganic cation homeostasis | 15                       | 3.41                     | 4.4             | $6.50 \times 10^{-06}$ |
