# Supplementary material for: Host Genetic Variation Influences Gene Expression Response to Rhinovirus Infection
Source: PubMed Central journal article supplement (PMC4395341; doi:10.1371/journal.pgen.1005111), 2015-04-13
Supplement: pgen.1005111.s011.pdf [file pgen.1005111.s011.pdf]

**Table S4.** Kyoto Encyclopedia of Genes and Genomes (KEGG) pathway enrichment analysis for the 271 genes that were both statistically differentially expressed and had a fold change of  $\geq 2$  in response to RV infection. Enriched KEGG pathways at P value cut-off of 0.05 are shown.

| Enriched KEGG Pathways                    | Observed Number of Genes | Expected Number of Genes | Fold Enrichment | Enrichment P Value     |
|-------------------------------------------|--------------------------|--------------------------|-----------------|------------------------|
| Cytosolic DNA-sensing pathway             | 14                       | 1.87                     | 7.5             | $1.20 \times 10^{-08}$ |
| Toll-like receptor signaling pathway      | 16                       | 3.33                     | 4.8             | $5.20 \times 10^{-07}$ |
| Cytokine-cytokine receptor interaction    | 21                       | 6.00                     | 3.5             | $9.50 \times 10^{-07}$ |
| RIG-I-like receptor signaling pathway     | 13                       | 2.32                     | 5.6             | $1.70 \times 10^{-06}$ |
| Autoimmune thyroid disease                | 8                        | 0.98                     | 8.2             | $2.80 \times 10^{-05}$ |
| Antigen processing and presentation       | 10                       | 1.96                     | 5.1             | $9.10 \times 10^{-05}$ |
| Chemokine signaling pathway               | 14                       | 5.19                     | 2.7             | $1.70 \times 10^{-03}$ |
| Regulation of autophagy                   | 6                        | 0.94                     | 6.4             | $1.80 \times 10^{-03}$ |
| Jak-STAT signaling pathway                | 12                       | 4.14                     | 2.9             | $2.00 \times 10^{-03}$ |
| PPAR signaling pathway                    | 6                        | 1.40                     | 4.3             | $1.10 \times 10^{-02}$ |
| Natural killer cell mediated cytotoxicity | 9                        | 3.75                     | 2.4             | $3.00 \times 10^{-02}$ |
| Arachidonic acid metabolism               | 4                        | 0.85                     | 4.7             | $4.90 \times 10^{-02}$ |
