# Supplementary material for: Host Genetic Variation Influences Gene Expression Response to Rhinovirus Infection
Source: PubMed Central journal article supplement (PMC4395341; doi:10.1371/journal.pgen.1005111), 2015-04-13
Supplement: pgen.1005111.s012.pdf [file pgen.1005111.s012.pdf]

**Table S5.** Comparison of most significant reQTL based on imputed and genotyped data.

| Hugo Gene ID | Ensembl Gene ID | Most Significant Local reQTL Based on Genotyped Data | P value reQTL Based on Genotyped Data | Most Significant Local reQTL Based on Imputed Data                                                                                                                                                                                               | P value reQTL Based on Imputed Data |
|--------------|-----------------|------------------------------------------------------|---------------------------------------|--------------------------------------------------------------------------------------------------------------------------------------------------------------------------------------------------------------------------------------------------|-------------------------------------|
| EXOSC9       | ENSG00000123737 | rs11731917                                           | 3.95E-17                              | rs55797638                                                                                                                                                                                                                                       | 2.91E-18                            |
| IRF5         | ENSG00000128604 | rs7807018                                            | 9.12E-18                              | rs10954213<br>rs13242262<br>rs10229001<br>rs4731533<br>rs4731534<br>rs2272347<br>rs7796963<br>rs6969930<br>rs11763684<br>rs7807018<br>rs4731536<br>rs10954215<br>rs11767711<br>rs6965542<br>rs12155080<br>rs60086303<br>rs10239340<br>rs34842192 | 9.12E-18                            |
| SLFN5        | ENSG00000166750 | rs11867191                                           | 4.73E-15                              | rs883416                                                                                                                                                                                                                                         | 4.72E-15                            |
| ANKDD1A      | ENSG00000166839 | rs871447                                             | 2.35E-14                              | rs28605697<br>rs9920138<br>rs832891<br>rs871447                                                                                                                                                                                                  | 2.35E-14                            |
| PRR24        | ENSG00000257704 | rs2032811                                            | 5.38E-14                              | rs2032811                                                                                                                                                                                                                                        | 2.60E-14                            |
| UBA7         | ENSG00000182179 | rs7649348                                            | 1.51E-12                              | rs7649348                                                                                                                                                                                                                                        | 1.51E-12                            |
| TMTC1        | ENSG00000133687 | rs4931220                                            | 2.31E-11                              | 12:29912275                                                                                                                                                                                                                                      | 1.93E-11                            |
| MASTL        | ENSG00000120539 | rs11598615                                           | 4.81E-10                              | rs7080173<br>rs7922972                                                                                                                                                                                                                           | 4.86E-11                            |
| FBN2         | ENSG00000138829 | rs6884224                                            | 7.50E-10                              | rs71955823                                                                                                                                                                                                                                       | 1.03E-10                            |
| AGTRAP       | ENSG00000177674 | rs7414943                                            | 5.22E-10                              | rs7414943                                                                                                                                                                                                                                        | 5.22E-10                            |
| MYO1D        | ENSG00000176658 | rs17182914                                           | 7.85E-10                              | rs17182935                                                                                                                                                                                                                                       | 6.41E-10                            |
| GSTM3        | ENSG00000134202 | rs10735234                                           | 1.89E-09                              | rs1109138<br>rs5776997<br>rs10735234                                                                                                                                                                                                             | 1.89E-09                            |
| KCNF1        | ENSG00000162975 | rs62120322                                           | 7.09E-07                              | rs1574302                                                                                                                                                                                                                                        | 3.86E-09                            |
| STOX1        | ENSG00000165730 | rs3740593                                            | 2.36E-08                              | rs35949960<br>rs12771648<br>rs150327559<br>rs61869906                                                                                                                                                                                            | 4.63E-09                            |
| TMEM176A     | ENSG00000002933 | rs6464100                                            | 1.37E-08                              | rs4725942<br>rs4725364<br>rs9691673                                                                                                                                                                                                              | 5.90E-09                            |
| IL36RN       | ENSG00000136695 | rs315946                                             | 6.82E-09                              | rs315946                                                                                                                                                                                                                                         | 6.82E-09                            |
| HOMER2       | ENSG00000103942 | rs10520576                                           | 1.53E-08                              | rs62010177                                                                                                                                                                                                                                       | 6.83E-09                            |

*Continued on next page*

Table S5 – Continued from previous page

|            |                 |               |          |                                                                                                                     |          |
|------------|-----------------|---------------|----------|---------------------------------------------------------------------------------------------------------------------|----------|
| SLC35F3    | ENSG00000183780 | rs594657      | 9.86E-08 | rs35822885                                                                                                          | 1.36E-08 |
| SPTLC2     | ENSG00000100596 | rs11159275    | 1.43E-08 | rs2012998<br>rs2003633<br>rs60221235<br>rs36063635<br>rs8003639<br>rs8003812<br>rs11159275<br>rs741850<br>rs2886131 | 1.43E-08 |
| RUFY4      | ENSG00000188282 | rs10187555    | 1.75E-07 | rs111856394<br>rs114593680                                                                                          | 2.16E-08 |
| AMDHD1     | ENSG00000139344 | rs7486703     | 3.38E-08 | 12:96337183<br>rs7486703                                                                                            | 3.38E-08 |
| DNTTIP1    | ENSG00000101457 | rs6124742     | 1.32E-07 | rs459955<br>rs380421                                                                                                | 3.57E-08 |
| OAS1       | ENSG00000089127 | rs7304898     | 2.59E-07 | 12:113370427<br>12:113374748                                                                                        | 4.09E-08 |
| ARL5B      | ENSG00000165997 | rs7099423     | 3.34E-07 | rs3740104                                                                                                           | 4.15E-08 |
| MFAP5      | ENSG00000197614 | rs7132012     | 4.27E-08 | rs7132012                                                                                                           | 4.27E-08 |
| ZSWIM7     | ENSG00000214941 | rs4792715     | 2.42E-07 | rs34243080                                                                                                          | 7.64E-08 |
| MSR1       | ENSG00000038945 | rs1405286     | 1.24E-07 | rs68112997                                                                                                          | 9.74E-08 |
| CCDC146    | ENSG00000135205 | rs17544690    | 1.21E-07 | rs67414486                                                                                                          | 1.12E-07 |
| KIAA0664L3 | ENSG00000131797 | rs1534507     | 3.26E-07 | rs1045483<br>rs34997130                                                                                             | 1.45E-07 |
| PODXL      | ENSG00000128567 | rs6467369     | 1.74E-07 | 7:130978775<br>rs6467369                                                                                            | 1.74E-07 |
| INPP1      | ENSG00000151689 | rs10931450    | 3.29E-07 | rs10188870                                                                                                          | 1.80E-07 |
| CALM1      | ENSG00000198668 | rs2343        | 3.14E-07 | rs1107073                                                                                                           | 2.29E-07 |
| ADCY3      | ENSG00000138031 | rs2033655     | 5.51E-07 | rs1541984                                                                                                           | 3.27E-07 |
| ITGA2      | ENSG00000164171 | rs17298242    | 6.53E-07 | rs17298242                                                                                                          | 6.53E-07 |
| PDE1B      | ENSG00000123360 | rs3782404     | 6.60E-07 | rs3782404                                                                                                           | 6.60E-07 |
| RAB31      | ENSG00000168461 | KG_18_9718160 | 6.67E-07 | KG_18_9718160                                                                                                       | 6.67E-07 |
| GJA3       | ENSG00000121743 | rs7981775     | 6.91E-07 | rs7981775                                                                                                           | 6.91E-07 |
| C17orf97   | ENSG00000187624 | rs62056208    | 4.44E-07 | NA                                                                                                                  | NA       |
