# Supplementary material for: Host Genetic Variation Influences Gene Expression Response to Rhinovirus Infection
Source: PubMed Central journal article supplement (PMC4395341; doi:10.1371/journal.pgen.1005111), 2015-04-13
Supplement: pgen.1005111.s013.pdf [file pgen.1005111.s013.pdf]

**Table S6.** ChIP-Seq enrichment results of input SNPs relative to the background SNPs based on all available human cell types and treatment conditions in the ENCODE data.

| <b>Protein</b> | <b>Observed Number of SNPs Overlapping with ChIP-Seq annotation</b> | <b>Expected Number of SNPs Overlapping with ChIP-Seq annotation</b> | <b>Fold Enrichment</b> | <b>Enrichment P value</b> |
|----------------|---------------------------------------------------------------------|---------------------------------------------------------------------|------------------------|---------------------------|
| STAT2          | 7                                                                   | 0.43                                                                | 16.30                  | 3.63E-07                  |
| SP2            | 4                                                                   | 0.67                                                                | 6.01                   | 0.004827995               |
| E2F4           | 10                                                                  | 1.77                                                                | 5.65                   | 1.64E-05                  |
| HMG3           | 13                                                                  | 3.24                                                                | 4.02                   | 3.37E-05                  |
| SP1            | 25                                                                  | 6.25                                                                | 4.00                   | 1.15E-08                  |
| SUZ12          | 4                                                                   | 1.01                                                                | 3.96                   | 0.019493751               |
| ETS1           | 9                                                                   | 2.31                                                                | 3.90                   | 0.000650801               |
| THAP1          | 2                                                                   | 0.53                                                                | 3.76                   | 0.100042713               |
| MEF2C          | 3                                                                   | 0.85                                                                | 3.52                   | 0.055019162               |
| RXRA           | 8                                                                   | 2.30                                                                | 3.48                   | 0.002573065               |
| POL2S2         | 9                                                                   | 3.01                                                                | 2.99                   | 0.003880327               |
| BRCA1          | 3                                                                   | 1.01                                                                | 2.96                   | 0.08261176                |
| SIN3AK20       | 14                                                                  | 4.86                                                                | 2.88                   | 0.000513032               |
| BCL3           | 4                                                                   | 1.39                                                                | 2.88                   | 0.052207273               |
| STAT1          | 7                                                                   | 2.45                                                                | 2.86                   | 0.012695208               |
| NRF1           | 5                                                                   | 1.88                                                                | 2.67                   | 0.042038959               |
| PU1            | 19                                                                  | 7.13                                                                | 2.66                   | 0.000156385               |
| CCNT2          | 11                                                                  | 4.18                                                                | 2.63                   | 0.003879436               |
| TCF4           | 13                                                                  | 5.00                                                                | 2.60                   | 0.001966539               |
| IRF1           | 8                                                                   | 3.11                                                                | 2.57                   | 0.014338596               |
| ELF1           | 19                                                                  | 7.63                                                                | 2.49                   | 0.000353747               |
| HAE2F1         | 18                                                                  | 7.27                                                                | 2.48                   | 0.000536636               |
| SRF            | 5                                                                   | 2.04                                                                | 2.45                   | 0.056335103               |
| TCF12          | 7                                                                   | 2.88                                                                | 2.43                   | 0.027888196               |
| TAF1           | 22                                                                  | 9.54                                                                | 2.31                   | 0.000361381               |
| HEY1           | 16                                                                  | 7.04                                                                | 2.27                   | 0.002468287               |
| ELK4           | 4                                                                   | 1.77                                                                | 2.26                   | 0.103737791               |
| NFYB           | 4                                                                   | 1.77                                                                | 2.26                   | 0.104358622               |
| IRF4           | 5                                                                   | 2.23                                                                | 2.24                   | 0.075691726               |
| EBF1           | 12                                                                  | 5.41                                                                | 2.22                   | 0.00958252                |
| NFKB           | 17                                                                  | 7.70                                                                | 2.21                   | 0.002492332               |
| POL24H8        | 30                                                                  | 14.03                                                               | 2.14                   | 0.000128488               |
| ATF3           | 2                                                                   | 0.95                                                                | 2.11                   | 0.245770054               |
| CFOS           | 16                                                                  | 7.83                                                                | 2.04                   | 0.006687411               |
| RFX5           | 6                                                                   | 2.96                                                                | 2.03                   | 0.079697216               |
| STAT3          | 14                                                                  | 7.08                                                                | 1.98                   | 0.013728924               |

*Continued on next page*

Table S6 – Continued from previous page

|          |    |       |      |             |
|----------|----|-------|------|-------------|
| CEBPB    | 22 | 11.23 | 1.96 | 0.002759492 |
| ZBTB7A   | 7  | 3.60  | 1.95 | 0.072864369 |
| PAX5C20  | 8  | 4.17  | 1.92 | 0.061858545 |
| E2F1     | 3  | 1.60  | 1.88 | 0.215577711 |
| MEF2A    | 4  | 2.19  | 1.83 | 0.17879643  |
| YY1      | 16 | 8.90  | 1.80 | 0.019852466 |
| SIX5     | 2  | 1.12  | 1.79 | 0.308030207 |
| POL2     | 51 | 29.31 | 1.74 | 0.00014804  |
| CJUN     | 10 | 5.97  | 1.68 | 0.081210134 |
| BAF155   | 2  | 1.19  | 1.67 | 0.335279941 |
| SETDB1   | 8  | 4.82  | 1.66 | 0.114500558 |
| P300     | 18 | 10.97 | 1.64 | 0.030880187 |
| TAF7     | 3  | 1.83  | 1.64 | 0.278087048 |
| POL2B    | 7  | 4.28  | 1.63 | 0.141983637 |
| FOXA2    | 6  | 3.75  | 1.60 | 0.177141182 |
| CHD2     | 4  | 2.52  | 1.59 | 0.24625173  |
| NFYA     | 3  | 1.94  | 1.55 | 0.305735142 |
| E2F6     | 8  | 5.24  | 1.53 | 0.158959732 |
| FOSL2    | 4  | 2.63  | 1.52 | 0.271032716 |
| ZNF143   | 4  | 2.75  | 1.46 | 0.296215796 |
| GATA3    | 5  | 3.61  | 1.39 | 0.295372892 |
| USF2     | 4  | 2.90  | 1.38 | 0.331367928 |
| HNF4G    | 3  | 2.23  | 1.35 | 0.3844789   |
| POU2F2   | 4  | 3.03  | 1.32 | 0.359640876 |
| OCT2     | 4  | 3.05  | 1.31 | 0.364942853 |
| USF1     | 10 | 8.08  | 1.24 | 0.292899924 |
| BATF     | 3  | 2.47  | 1.22 | 0.447821673 |
| HNF4A    | 4  | 3.29  | 1.22 | 0.417694026 |
| GABP     | 5  | 4.11  | 1.22 | 0.39353891  |
| CTCF     | 28 | 23.15 | 1.21 | 0.17936741  |
| TBP      | 11 | 9.16  | 1.20 | 0.313156146 |
| AP2GAMMA | 5  | 4.32  | 1.16 | 0.432634702 |
| JUND     | 11 | 9.52  | 1.16 | 0.357125172 |
| MAFF     | 4  | 3.50  | 1.14 | 0.464273736 |
| GATA1    | 6  | 5.32  | 1.13 | 0.440175825 |
| MXI1     | 3  | 2.71  | 1.11 | 0.509338766 |
| CMYC     | 11 | 10.05 | 1.10 | 0.42269294  |
| MAX      | 11 | 10.06 | 1.09 | 0.424177322 |
| NRSF     | 4  | 3.83  | 1.05 | 0.532200012 |
| EGR1     | 6  | 6.12  | 0.98 | 0.573849446 |
| INI1     | 2  | 2.05  | 0.97 | 0.608426063 |

Continued on next page

*Table S6 – Continued from previous page*

|          |   |       |      |             |
|----------|---|-------|------|-------------|
| GATA2    | 9 | 9.80  | 0.92 | 0.645115619 |
| SMC3     | 5 | 5.75  | 0.87 | 0.680033696 |
| FOXA1    | 8 | 9.28  | 0.86 | 0.70838594  |
| RAD21    | 9 | 11.88 | 0.76 | 0.838231855 |
| MAFK     | 5 | 7.35  | 0.68 | 0.857611967 |
| AP2ALPHA | 2 | 3.01  | 0.67 | 0.802217129 |
| TAL1     | 2 | 3.13  | 0.64 | 0.819119374 |
| GR       | 2 | 3.67  | 0.55 | 0.881269064 |
| ZNF263   | 3 | 6.83  | 0.44 | 0.966718443 |
