# Supplementary material for: Host Genetic Variation Influences Gene Expression Response to Rhinovirus Infection
Source: PubMed Central journal article supplement (PMC4395341; doi:10.1371/journal.pgen.1005111), 2015-04-13
Supplement: pgen.1005111.s014.pdf [file pgen.1005111.s014.pdf]

**Table S7.** reQTL loci variants that overlap with STAT2 ChIP-Seq annotation. LD ( $r^2$ ) is based on 1000 Genomes Phase 1 EUR population.

| <b>Hugo Gene ID</b> | <b>Ensembl Gene ID</b> | <b>Most Significant Local reQTL Based on Genotyped Data</b> | <b>Variant that Overlaps with STAT2 ChIP-Seq Annotation</b> | <b>Cell Type/Treatment in which ChIP-Seq Signal was Annotated</b> | <b>LD (<math>r^2</math>) Between Most Significant Local reQTL and Variant that Overlaps with STAT2 binding site</b> |
|---------------------|------------------------|-------------------------------------------------------------|-------------------------------------------------------------|-------------------------------------------------------------------|---------------------------------------------------------------------------------------------------------------------|
| EXOSC9              | ENSG00000123737        | rs11731917                                                  | rs3828485                                                   | K562/IFNa30min, K562/IFNa6h                                       | 0.92                                                                                                                |
| ARL5B               | ENSG00000165997        | rs7099423                                                   | rs11015435                                                  | K562/IFNa6h                                                       | 0.87                                                                                                                |
| OAS1                | ENSG00000089127        | rs7304898                                                   | rs1156361                                                   | K562/IFNa6h                                                       | 0.98                                                                                                                |
| OAS1                | ENSG00000089127        | rs7304898                                                   | rs3815178                                                   | K562/IFNa6h                                                       | 0.97                                                                                                                |
| OAS1                | ENSG00000089127        | rs7304898                                                   | rs1859331                                                   | K562/IFNa6h                                                       | 0.95                                                                                                                |
| SLFN5               | ENSG00000166750        | rs11867191                                                  | rs11080327                                                  | K562/IFNa30min, K562/IFNa6h                                       | 0.95                                                                                                                |
| PRR24               | ENSG00000257704        | rs2032811                                                   | rs918434                                                    | K562/IFNa30min                                                    | 0.94                                                                                                                |
