# Supplementary material for: Host Genetic Variation Influences Gene Expression Response to Rhinovirus Infection
Source: PubMed Central journal article supplement (PMC4395341; doi:10.1371/journal.pgen.1005111), 2015-04-13
Supplement: pgen.1005111.s015.pdf [file pgen.1005111.s015.pdf]

**Table S8.** Quality control check of genome-wide significant distant eQTLs **A)** in uninfected cells **B)** in RV-infected cells. For each gene that was putatively *trans* regulated, we attempted to map each of its probes within 2 Mb of the *trans*-eQTL using SHRiMP with relaxed mapping setting; match score of 10, mismatch score of 0, gap open penalty of -250, gap extension penalty of -100, and minimal Smith-Waterman score of 30%. *Trans*-eQTLs whose associated trans-probe mapped its vicinity failed quality control check.

**A)**

| Hugo Gene ID  | Ensembl Gene ID | Probe ID     | Trans eQTL | Trans eQTL Chr Position | Target Locus       |                       | Potential Cross-Hybridization Locus |                      | Passed QC |
|---------------|-----------------|--------------|------------|-------------------------|--------------------|-----------------------|-------------------------------------|----------------------|-----------|
|               |                 |              |            |                         | Alignment Identity | Chr Position          | Alignment Identity                  | Chr Position         |           |
| RP11-824M15.1 | ENSG00000224161 | ILMN_3291511 | rs10876864 | chr12:56401085          | 100%               | 18:57428812-57428861  | 90%                                 | 12:56436228-56436277 | No        |
| RP11-824M15.1 | ENSG00000224161 | ILMN_1737991 | rs10876864 | chr12:56401085          | 100%               | 18:57429067-57429116  | 80%                                 | 12:56437243-56437292 | No        |
| RP11-459K23.1 | ENSG00000227887 | ILMN_3236675 | rs10876864 | chr12:56401085          | 100%               | 1:208870720-208870769 | 72%                                 | 12:56437240-56437289 | No        |
| RPS26P2       | ENSG00000233278 | ILMN_3290019 | rs10876864 | chr12:56401085          | 100%               | 9:30831910-30831959   | 94%                                 | 12:56437230-56437279 | No        |
| RP11-777J24.1 | ENSG00000233778 | ILMN_1657950 | rs10876864 | chr12:56401085          | 100%               | 8:93156573-93156622   | 90%                                 | 12:56436247-56436296 | No        |
| RP11-57C13.5  | ENSG00000234192 | ILMN_3190596 | rs10876864 | chr12:56401085          | 100%               | 10:89402626-89402675  | 92%                                 | 12:56437228-56437277 | No        |
| RPS26P35      | ENSG00000242206 | ILMN_1677697 | rs10876864 | chr12:56401085          | 100%               | 8:119774202-119774251 | 96%                                 | 12:56437153-56437202 | No        |
| RP11-713H12.1 | ENSG00000244604 | ILMN_3296994 | rs10876864 | chr12:56401085          | 100%               | 17:8464670-8464719    | 72%                                 | 12:56436328-56436377 | No        |
| SBNO2         | ENSG00000064932 | ILMN_1808811 | rs890294   | chr5:94405027           | 100%               | 19:1107866-1107915    |                                     |                      | Yes       |
| STX1B         | ENSG00000099365 | ILMN_3234081 | rs10876864 | chr12:56401085          | 100%               | 16:31000580-31000629  |                                     |                      | Yes       |
| STX1B         | ENSG00000099365 | ILMN_3189972 | rs10876864 | chr12:56401085          | 100%               | 16:31001369-31001418  |                                     |                      | Yes       |
| STX1B         | ENSG00000099365 | ILMN_1660721 | rs10876864 | chr12:56401085          | 100%               | 16:31003560-31003609  |                                     |                      | Yes       |
| CTD-2588C8.1  | ENSG00000239210 | ILMN_3254492 | rs10876864 | chr12:56401085          | 100%               | 19:35024337-35024386  |                                     |                      | Yes       |
| GAPDHP61      | ENSG00000248415 | ILMN_3267451 | rs2072373  | chr12:6631888           | 100%               | 15:64820974-64821023  |                                     |                      | Yes       |

**B)**

| Hugo Gene ID  | Ensembl Gene ID | Probe ID     | Trans eQTL | Trans eQTL Chr Position | Target Locus       |                       | Potential Cross-Hybridization Locus |                      | Passed QC |
|---------------|-----------------|--------------|------------|-------------------------|--------------------|-----------------------|-------------------------------------|----------------------|-----------|
|               |                 |              |            |                         | Alignment Identity | Chr Position          | Alignment Identity                  | Chr Position         |           |
| RP11-824M15.1 | ENSG00000224161 | ILMN_3291511 | rs10876864 | chr12:56401085          | 100%               | 18:57428812-57428861  | 90%                                 | 12:56436228-56436277 | No        |
| RP11-824M15.1 | ENSG00000224161 | ILMN_1737991 | rs10876864 | chr12:56401085          | 100%               | 18:57429067-57429116  | 80%                                 | 12:56437243-56437292 | No        |
| RP11-196I18.3 | ENSG00000225531 | ILMN_3180196 | rs2956114  | chr11:34937813          | 100%               | 9:109879221-109879270 | 86%                                 | 11:34916554-34916603 | No        |
| RP11-196I18.3 | ENSG00000225531 | ILMN_3260618 | rs2956114  | chr11:34937813          | 100%               | 9:109879456-109879505 | 94%                                 | 11:34909905-34909954 | No        |
| RP11-459K23.1 | ENSG00000227887 | ILMN_3236675 | rs10876864 | chr12:56401085          | 100%               | 1:208870720-208870769 | 72%                                 | 12:56437240-56437289 | No        |
| RPS26P2       | ENSG00000233278 | ILMN_3290019 | rs10876864 | chr12:56401085          | 100%               | 9:30831910-30831959   | 94%                                 | 12:56437230-56437279 | No        |
| RP11-777J24.1 | ENSG00000233778 | ILMN_1657950 | rs10876864 | chr12:56401085          | 100%               | 8:93156573-93156622   | 90%                                 | 12:56436247-56436296 | No        |
| RP11-57C13.5  | ENSG00000234192 | ILMN_3190596 | rs10876864 | chr12:56401085          | 100%               | 10:89402626-89402675  | 92%                                 | 12:56437228-56437277 | No        |
| RP11-310H4.5  | ENSG00000234844 | ILMN_3282321 | rs2268179  | chr1:22414785           | 100%               | 7:55706083-55706132   | 96%                                 | 1:22413280-22413329  | No        |
| RPS26P35      | ENSG00000242206 | ILMN_1677697 | rs10876864 | chr12:56401085          | 100%               | 8:119774202-119774251 | 96%                                 | 12:56437153-56437202 | No        |
| RP11-713H12.1 | ENSG00000244604 | ILMN_3296994 | rs10876864 | chr12:56401085          | 100%               | 17:8464670-8464719    | 72%                                 | 12:56436328-56436377 | No        |
| STX1B         | ENSG00000099365 | ILMN_3234081 | rs10876864 | chr12:56401085          | 100%               | 16:31000580-31000629  |                                     |                      | Yes       |
| STX1B         | ENSG00000099365 | ILMN_3189972 | rs10876864 | chr12:56401085          | 100%               | 16:31001369-31001418  |                                     |                      | Yes       |
| STX1B         | ENSG00000099365 | ILMN_1660721 | rs10876864 | chr12:56401085          | 100%               | 16:31003560-31003609  |                                     |                      | Yes       |
| LIMS1         | ENSG00000169756 | ILMN_1675387 | rs73727334 | chr6:32570667           | 100%               | 2:109292339-109292388 |                                     |                      | Yes       |
| LIMS1         | ENSG00000169756 | ILMN_2381037 | rs73727334 | chr6:32570667           | 100%               | 2:109300819-109300868 |                                     |                      | Yes       |
| OR2AG1        | ENSG00000170803 | ILMN_1732467 | rs1131964  | chr21:34610487          | 100%               | 11:6806736-6806785    |                                     |                      | Yes       |
| CTD-2588C8.1  | ENSG00000239210 | ILMN_3254492 | rs10876864 | chr12:56401085          | 100%               | 19:35024337-35024386  |                                     |                      | Yes       |
| HBB           | ENSG00000244734 | ILMN_2100437 | rs6124072  | chr20:59759789          | 100%               | 11:5246808-5246857    |                                     |                      | Yes       |
| GAPDHP61      | ENSG00000248415 | ILMN_3267451 | rs11064213 | chr12:6580376           | 100%               | 15:64820974-64821023  |                                     |                      | Yes       |
